# Supplementary material
Source: PubMed Central journal article supplement (PMC3705613)
Supplement: 97320630009443S1.pdf [file 97320630009443S1.pdf]

## Supplementary material:

**Table 1:** MAPK members with abiotic components.

| Class of Species | Name                                                           |
|------------------|----------------------------------------------------------------|
| SIMPLE_MOLECULE  | Cold                                                           |
| SIMPLE_MOLECULE  | Salt                                                           |
| SIMPLE_MOLECULE  | Drought                                                        |
| SIMPLE_MOLECULE  | H2O2                                                           |
| SIMPLE_MOLECULE  | Heavy Metal                                                    |
| SIMPLE_MOLECULE  | Ethylene                                                       |
| PROTEIN          | RLKs                                                           |
| PROTEIN          | LRR                                                            |
| PROTEIN          | CRKs                                                           |
| PROTEIN          | LecRK2                                                         |
| PROTEIN          | ETR1                                                           |
| PROTEIN          | ETR2                                                           |
| PROTEIN          | MAPKKK                                                         |
| PROTEIN          | MAPKKK                                                         |
| PROTEIN          | MAPKKK1                                                        |
| PROTEIN          | CTR1                                                           |
| PROTEIN          | MAPKK                                                          |
| PROTEIN          | MAPKK                                                          |
| PROTEIN          | MAPK                                                           |
| PROTEIN          | MAPK                                                           |
| PROTEIN          | MAPKK1                                                         |
| PROTEIN          | MAPKK2                                                         |
| PROTEIN          | MAPKK3                                                         |
| PROTEIN          | MAPKK4                                                         |
| PROTEIN          | MAPKK5                                                         |
| PROTEIN          | MAPKK6                                                         |
| PROTEIN          | MAPKK7                                                         |
| PROTEIN          | MAPKK9                                                         |
| PROTEIN          | MAPK2                                                          |
| PROTEIN          | MAPK3                                                          |
| PROTEIN          | MAPK4                                                          |
| PROTEIN          | MAPK6                                                          |
| PROTEIN          | WRKY1                                                          |
| PROTEIN          | WRKY1                                                          |
| PROTEIN          | WRKY12                                                         |
| PROTEIN          | WRKY12                                                         |
| PROTEIN          | WRKY8                                                          |
| PROTEIN          | WRKY8                                                          |
| PROTEIN          | WRKY25                                                         |
| PROTEIN          | WRKY25                                                         |
| PROTEIN          | WRKY22                                                         |
| PROTEIN          | WRKY22                                                         |
| PROTEIN          | WRKY29                                                         |
| PROTEIN          | WRKY29                                                         |
| PROTEIN          | WRKY33                                                         |
| PROTEIN          | WRKY33                                                         |
| PROTEIN          | WRKY28                                                         |
| PROTEIN          | WRKY28                                                         |
| PROTEIN          | MYB2                                                           |
| PROTEIN          | MYB2                                                           |
| PROTEIN          | MYB4                                                           |
| PROTEIN          | MYB4                                                           |
| PROTEIN          | MYB44                                                          |
| PROTEIN          | NAC                                                            |
| PROTEIN          | bZIP                                                           |
| PROTEIN          | AP2                                                            |
| PHENOTYPE        | Response (Cell division, cell growth and cell differentiation) |

**Table 2:** MAPKs members with biotic components.

| <b>Class of Species</b> | <b>Name</b>                                                    |
|-------------------------|----------------------------------------------------------------|
| SIMPLE_MOLECULE         | Fungal pathogen                                                |
| SIMPLE_MOLECULE         | Bacterial pathogen                                             |
| PROTEIN                 | LysM                                                           |
| PROTEIN                 | PRRs                                                           |
| PROTEIN                 | FLS2                                                           |
| PROTEIN                 | LRR                                                            |
| PROTEIN                 | MAPKKK                                                         |
| PROTEIN                 | MAPKKK                                                         |
| PROTEIN                 | MAPKKK1                                                        |
| PROTEIN                 | MAPKKK18                                                       |
| PROTEIN                 | MAPKKK19                                                       |
| PROTEIN                 | MAPKKK20                                                       |
| PROTEIN                 | EDR1                                                           |
| PROTEIN                 | MAPKK                                                          |
| PROTEIN                 | MAPKK                                                          |
| PROTEIN                 | MAPKK2                                                         |
| PROTEIN                 | MAPKK4                                                         |
| PROTEIN                 | MAPKK5                                                         |
| PROTEIN                 | MAPKK9                                                         |
| PROTEIN                 | MAPK                                                           |
| PROTEIN                 | MAPK                                                           |
| PROTEIN                 | MAPK2                                                          |
| PROTEIN                 | MAPK3                                                          |
| PROTEIN                 | MAPK4                                                          |
| PROTEIN                 | MAPK6                                                          |
| PROTEIN                 | SIMK                                                           |
| PROTEIN                 | SAMK                                                           |
| PROTEIN                 | WRKY1                                                          |
| PROTEIN                 | WRKY1                                                          |
| PROTEIN                 | MYB2                                                           |
| PROTEIN                 | MYB2                                                           |
| PROTEIN                 | WRKY33                                                         |
| PROTEIN                 | WRKY33                                                         |
| PROTEIN                 | WRKY6                                                          |
| PROTEIN                 | WRKY6                                                          |
| PROTEIN                 | MYB4                                                           |
| PROTEIN                 | MYB4                                                           |
| PROTEIN                 | WRKY25                                                         |
| PROTEIN                 | WRKY25                                                         |
| PROTEIN                 | WRKY12                                                         |
| PROTEIN                 | WRKY12                                                         |
| PROTEIN                 | WRKY22                                                         |
| PROTEIN                 | WRKY22                                                         |
| PROTEIN                 | WRKY28                                                         |
| PROTEIN                 | WRKY28                                                         |
| PROTEIN                 | WRKY29                                                         |
| PROTEIN                 | WRKY29                                                         |
| PROTEIN                 | MYB44                                                          |
| PROTEIN                 | NAC                                                            |
| PROTEIN                 | bZIP                                                           |
| PROTEIN                 | AP2                                                            |
| PHENOTYPE               | Response (Cell division, cell growth and cell differentiation) |
